1 Article

# 2 Mitochondrial DNA Repair in an *Arabidopsis* 3 *thaliana* Uracil N-Glycosylase Mutant

4 Emily Wynn<sup>1,2</sup> (OrcID 0000-0001-6902-9301), Emma Purfeerst<sup>1,\*</sup>, Alan Christensen<sup>1,†</sup> (OrcID  
5 0000-0002-1125-3172)

6 <sup>1</sup> School of Biological Sciences, University of Nebraska – Lincoln, Lincoln, NE, USA

7 <sup>2</sup> United States Department of Agriculture, Agricultural Research Service, U.S. Meat Animal  
8 Research Center, Clay Center, NE, USA

9 \* Current address: Athletics Department, Bethany Lutheran College, Mankato, MN, USA

10 † Correspondence: Email: [achristensen2@unl.edu](mailto:achristensen2@unl.edu); Tel: +1 402 472 0681; FAX +1 402 472 8722

11 **Abstract:** Substitution rates in plant mitochondrial genes are extremely low, indicating strong  
12 selective pressure as well as efficient repair. Plant mitochondria possess base excision repair  
13 pathways, however, many repair pathways such as nucleotide excision repair and mismatch repair  
14 appear to be absent. In the absence of these pathways, many DNA lesions must be repaired by a  
15 different mechanism. To test the hypothesis that double-strand break repair (DSBR) is that  
16 mechanism, we maintained independent self-crossing lineages of plants deficient in  
17 uracil-N-glycosylase (UNG) for 11 generations to determine the repair outcomes when that  
18 pathway is missing. Surprisingly, no single nucleotide polymorphisms (SNPs) were fixed in any  
19 line in generation 11. The pattern of heteroplasmic SNPs was also unaltered through 11  
20 generations. When the rate of cytosine deamination was increased by mitochondrial expression of  
21 the cytosine deaminase APOBEC3G, there was an increase in heteroplasmic SNPs, but only in  
22 mature leaves. Clearly DNA maintenance in reproductive meristem mitochondria is very effective  
23 in the absence of UNG, while mitochondrial genomes in differentiated tissue are maintained  
24 through a different mechanism, or not at all. Several genes involved in DSBR are upregulated in the  
25 absence of UNG, indicating that double strand break repair is a general system of repair in plant  
26 mitochondria. It is important to note that the developmental stage of tissues is critically important  
27 for these types of experiments.

28 **Keywords:** mitochondria; DNA repair; double-strand break repair, Uracil-N-Glycosylase  
29

---

## 30 1. Introduction

31 Plant mitochondrial genomes have very low base substitution rates, while also expanding and  
32 rearranging rapidly [1-5]. The low substitution rate and the high rearrangement rate of plant  
33 mitochondria can be explained by selection and the specific DNA damage repair mechanisms  
34 available. These mechanisms can also account for the genome expansions often found in land plant  
35 mitochondria [6]. The low nonsynonymous substitution rates in protein coding genes indicate that  
36 selective pressure to maintain the genes is high, and the low synonymous substitution rates indicate  
37 that the DNA repair mechanisms are very accurate [7, 8]. Despite the low mutation rate of  
38 mitochondrial genes over evolutionary time, mitochondrial genomes in mature cells accumulate  
39 DNA damage that is not repaired [9]. This indicates that there are fundamental differences between  
40 DNA maintenance in genomes meant to be passed on to the next generation and genomes that are  
41 not. In meristematic cells, mitochondria fuse together to form a large mitochondrion [10]. This fusion

42 brings mitochondrial genomes together for genome replication, but also ensures that there is a  
43 homologous template available for DNA repair. These meristematic cells eventually produce the  
44 reproductive tissue of a plant; from embryogenesis to egg cell production the mitochondrial  
45 genomes inherited from parents and passed down to offspring will have homologous templates  
46 available to them [11].

47 Much less is known about the multiple pathways of DNA repair in plant mitochondria than in  
48 other systems, such as the nucleus. So far, there is no evidence of nucleotide excision repair (NER),  
49 nor mismatch repair (MMR) in plant mitochondria [12, 13]. It has been hypothesized that in plant  
50 mitochondria, the types of DNA damage that are usually repaired through NER and MMR are  
51 repaired through double-strand break repair (DSBR) [14, 15]. Plant mitochondria do have the  
52 nuclear-encoded base excision repair (BER) pathway enzyme Uracil DNA glycosylase (UNG) [12].  
53 UNG is an enzyme that can recognize and bind to uracil in DNA and begin the process of base  
54 excision repair by enzymatically excising uracil (U) from single stranded or double stranded DNA  
55 [16]. Uracil can appear in a DNA strand due to the spontaneous deamination of cytosine, or by the  
56 misincorporation of dUTP during replication [17]. Unrepaired uracil in DNA can lead to G-C to A-T  
57 transitions within the genome.

58 In light of the apparent absences of NER and MMR in plant mitochondria, it is possible that  
59 many lesions, including mismatches, are repaired by creating double-strand breaks and using a  
60 template to repair both strands. Our hypothesis is that DSBR accounts for most of the repair in  
61 meristematic plant mitochondria, and both error-prone and accurate subtypes of DSBR lead to the  
62 observed patterns of genome evolution [18]. One way of testing this is to eliminate the pathway of  
63 uracil base excision repair and ask if the G-U mispairs that occur by spontaneous deamination are  
64 repaired, and if so, are instead repaired by DSBR. In this work we examine an *Arabidopsis thaliana*  
65 *ung* knockout line and investigate the effects on the mitochondrial genome over many generations.  
66 To disrupt the genome further, we express the cytidine deaminase APOBEC3G in the *Arabidopsis*  
67 mitochondria (MTP-A3G) to increase the rate of cytosine deamination and accelerate DNA damage.

68 One of the hallmarks of DSBR in plant mitochondria is the effect on the non-tandem repeats that  
69 exist in virtually all plant mitochondria [19]. The *Arabidopsis thaliana* mitochondrial genome contains  
70 two pairs of very large repeats (4.2 and 6.6kb) that commonly undergo recombination [20-22]  
71 producing multiple isoforms of the genome. The mitochondrial genome also contains many  
72 non-tandem repeats between 50 and 1000 base pairs,[19, 22-24]. In wild type plants, these repeats  
73 recombine at very low rates, but they have been shown to recombine with ectopic repeat copies at  
74 higher rates in several mutants in DSBR-related genes, such as *msh1* and *reca3* [25-27]. Thus, genome  
75 dynamics around non-tandem repeats can be an indicator of increased DSBs. In this work we show  
76 that a loss of uracil base excision repair leads to alterations in repeat dynamics.

77 Numerous proteins known to be involved in the processing of plant mitochondrial DSBs have  
78 been characterized. Plants lacking the activity of mitochondrially targeted *recA* homologs have been  
79 shown to be deficient in DSBR [26, 28]. In addition, it has been hypothesized that the plant MSH1  
80 protein may be involved in binding to DNA lesions and initiating DSBs [14, 15]. The MSH1 protein  
81 contains a mismatch binding domain fused to a GIY-YIG type endonuclease domain which may be  
82 able to make DSBs [29, 30]. In this work we provide evidence that in the absence of mitochondrial  
83 UNG activity, several genes involved in DSBR, including *MSH1*, are transcriptionally upregulated,  
84 providing a possible explanation for the increased DSBR. We also provide additional evidence to  
85 support the hypothesis that mitochondrial DNA maintenance is abandoned in non-meristematic  
86 tissue [31], calling attention to the need to closely control for age and developmental state in  
87 experiments involving the mitochondrial genome.

88

## 89 2. Results

### 90 2.1. Lack of UNG activity in mutants

91 It has previously been reported that cell extracts of the *Arabidopsis thaliana ung* T-DNA insertion  
92 strain used in this experiment, GK-440E07 (ABRC seed stock CS308282), show no uracil glycosylase  
93 activity [12]. To increase the rate of cytosine deamination in the mitochondrial genome and show  
94 that effects of the UNG knockout on mitochondrial mutation rates could be detected, the catalytic  
95 domain of the human APOBEC3G-CTD 2K3A cytidine deaminase (A3G) [32] was expressed under  
96 the control of the Ubiquitin-10 promoter [33] in both wild-type and *ung Arabidopsis thaliana* lines and  
97 targeted to the mitochondria by an amino-terminal fusion of the 62 amino acid mitochondrial  
98 targeting peptide (MTP) from the Alternative Oxidase 1A protein. Fluorescence microscopy of  
99 *Arabidopsis thaliana* expressing an MTP-A3G-GFP fusion shows that the MTP-A3G construct is  
100 expressed and targeted to the mitochondria (Supplemental Figure S1).

101 We expected that in the absence of UNG there would be an increase in G-C to A-T substitution  
102 mutations. To test this prediction, we sequenced a wild-type *Arabidopsis* plant (Col-0), a wild-type  
103 *Arabidopsis* plant expressing the MTP-A3G construct (Col-0 MTP-A3G) and a *ung* plant expressing  
104 the MTP-A3G construct (*ung* MTP-A3G) using an Illumina Hi-Seq4000 system. Mitochondrial  
105 sequence reads from these plants were aligned to the Columbia-0 reference genome (modified as  
106 described in Materials and Methods) using BWA-MEM [34] and single nucleotide polymorphisms  
107 were identified using VarDict [35].

108 There were no SNPs that reached fixation (an allele frequency of 1) in any plant. Mitochondrial  
109 genomes are not diploid; each cell can have many copies of the mitochondrial genome. Therefore, it  
110 is possible that an individual plant could accumulate low frequency mutations in some of the  
111 mitochondrial genomes in the cell. VarDict was used to detect heteroplasmic SNPs at allele  
112 frequencies as low as 0.01. VarDict's sensitivity in calling low frequency SNPs scales with depth of  
113 coverage and quality of the sample, so it is not possible to directly compare heteroplasmic mutation  
114 rates in samples with different depths of coverage. However, because the activity of the UNG  
115 protein is specific to uracil, the absence of the UNG protein should not have any effect on mutation  
116 rates other than G-C to A-T transitions. Comparing the numbers of G-C to A-T transitions to all other  
117 substitutions should reveal if the rate of mutations that can be repaired by UNG is elevated  
118 compared to the background rate. If the *ung* MTP-A3G line is accumulating G-C to A-T transitions at  
119 a faster rate than the Col-0 MTP-A3G line, we would expect to see that as an increased ratio of G-C to  
120 A-T transitions compared to other mutation types. Complicating the analysis, significant portions of  
121 the *A. thaliana* mitochondrial genome have been duplicated in the nucleus, forming regions called  
122 NuMTs. Mutations in the NuMTs might appear to be low frequency SNPs in the mitochondrial  
123 genome, confounding the results. However, these mutations are likely to be shared in the common  
124 nuclear background of all our lines. To avoid attributing SNPs in NuMTs to the mitochondrial  
125 genome, only those SNPs unique to individual plant lines were used in this comparison. The Col-0  
126 plant had a heteroplasmic GC-AT/total SNPs ratio of 0.073, the Col-0 MTP-A3G plant had a  
127 heteroplasmic GC-AT/total SNPs ratio of 0.44, while the *ung* MTP-A3G plant had a heteroplasmic  
128 GC-AT/total SNPs ratio of 0.61 (Table 1). Therefore, when the rate of cytosine deamination is  
129 increased by the activity of APOBEC3G, *Arabidopsis* plants accumulate GC-AT SNPs, and *ung*  
130 plants accumulate GC-AT SNPs faster than wild-type plants. Our computational pipeline is able to  
131 detect both MTP-A3G activity and the effect of the *ung* knockout.

132

133 **Table 1. Heteroplasmic mitochondrial SNPs in Col-0 wild-type, generation 10 *ung* mutant lines,**  
134 **Col-0 MTP-A3G, and *ung* MTP-A3G.** SNPs were called using VarDict as described in Methods. SNP  
135 counts are shown for the entire mitochondrial genome. For the full spectrum of SNP types, including  
136 allele frequencies, see supplemental file 2.

| Sample             | GC-AT<br>SNPs | Total<br>SNPs | GC-AT<br>/Total<br>SNP Ratio |
|--------------------|---------------|---------------|------------------------------|
| Col-0              | 17            | 234           | 0.073                        |
| <i>ung</i> 10 115  | 9             | 96            | 0.094                        |
| <i>ung</i> 10 159  | 12            | 146           | 0.082                        |
| <i>ung</i> 10 163  | 69            | 1261          | 0.055                        |
| <i>ung</i> 10 176  | 42            | 615           | 0.068                        |
| <i>ung</i> 10 198  | 9             | 73            | 0.12                         |
| <i>ung</i> 10 201  | 6             | 126           | 0.048                        |
| <i>ung</i> 10 203  | 8             | 101           | 0.079                        |
| Col-0 MTP-A3G      | 78            | 177           | 0.44                         |
| <i>ung</i> MTP-A3G | 76            | 124           | 0.61                         |

137

## 138 2.2. Mutation accumulation in the absence of UNG

139 To determine the effects of the *ung* knockout across multiple generations, we performed a  
140 mutation accumulation study [36]. We chose 23 different *ung* homozygous plants derived from one  
141 hemizygous parent. These 23 plants were designated as generation 1 *ung* and allowed to self-cross.  
142 The next generation was derived by single-seed descent from each line, and this was repeated until  
143 generation 10 *ung* plants were obtained. Leaf tissue and progeny seeds from each line were kept at  
144 each generation.

145 The leaf tissue from generation 10 of the *ung* mutation accumulation lines and a wild-type Col-0  
146 were sequenced and analyzed with VarDict as described above. Similar to the MTP-A3G plants,  
147 there were no SNPs in any of our *ung* mutation accumulation lines that had reached fixation (an  
148 allele frequency of one). In contrast, there was no relative increase in the ratios of GC-AT/total SNPs  
149 between the *ung* lines and Col-0 (see Table 1). Because detection of low frequency SNPs depends on  
150 read depth, we only report the 7 *ung* samples with an average mitochondrial read depth above 125x  
151 for this comparison. In the absence of a functional UNG protein and under normal greenhouse  
152 physiological conditions, plant mitochondria do not accumulate cytosine deamination mutations at  
153 an increased rate.

## 154 2.3 Nuclear Mutation Accumulation

155 UNG is the only Uracil-N-Glycosylase in *Arabidopsis thaliana* and may be active in the nucleus as  
156 well as the mitochondria [12]. To test for nuclear mutations due to the absence of UNG, sequences  
157 were aligned to the Columbia-0 reference genome using BWA-MEM and single nucleotide  
158 polymorphisms were identified using Bcftools Call [37]. There is more variability in nuclear  
159 mutation ratios than mitochondrial due to the low total number of SNPs detected, however the *ung*  
160 mutation accumulation lines do not have an elevated G-C to A-T mutation rate compared to  
161 wild-type (Table 2).

162

163 **Table 2: Nuclear SNPs in Col-0 wild-type, *ung* mutant lines, Col-0 MTP-A3G, and *ung***  
164 **MTP-A3G.** SNPs were called using Bcftools Call as described in Methods. SNP counts are shown for  
165 5Mb regions of each chromosome, excluding chromosome 2. For individual data on each  
166 chromosome see supplemental file 2.

| Sample | GC-AT | Total | GC-AT |
|--------|-------|-------|-------|
|--------|-------|-------|-------|

|                    | SNPs | SNPs | /Total<br>SNP Ratio |
|--------------------|------|------|---------------------|
| Col-0              | 1    | 3    | 0.33                |
| <i>ung10 115</i>   | 1    | 16   | 0.063               |
| <i>ung10 159</i>   | 0    | 8    | 0                   |
| <i>ung10 163</i>   | 5    | 10   | 0.5                 |
| <i>ung10 176</i>   | 0    | 5    | 0                   |
| <i>ung10 198</i>   | 3    | 14   | 0.21                |
| <i>ung10 201</i>   | 4    | 21   | 0.19                |
| <i>ung10 203</i>   | 3    | 11   | 0.27                |
| Col-0 MTP-A3G      | 1    | 3    | 0.33                |
| <i>ung</i> MTP-A3G | 0    | 10   | 0                   |

167

168

#### 169 2.4 Alternative Repair Pathway Genes

170 Because the *ung* mutants show increased double-strand break repair but not an increase of G-C  
 171 to A-T transition mutations, we infer that the inevitable appearance of uracil in the DNA is repaired  
 172 via conversion of a G-U pair to a double-strand break and efficiently repaired by the DSBR pathway.  
 173 If this is true, genes involved in the DSBR processes of breakage, homology surveillance and strand  
 174 invasion in mitochondria will be up-regulated in *ung* mutants. To test this hypothesis, we assayed  
 175 transcript levels of several candidate genes known to be involved in DSBR [13, 23, 25-28, 38-41] in  
 176 *ung* lines compared to wild-type using RT-PCR. *MSH1* and *RECA2* were significantly upregulated in  
 177 *ung* lines (*MSH1*: 5.60-fold increase, unpaired T-test  $p < 0.05$ . *RECA2*: 3.19-fold increase, unpaired  
 178 T-test  $p < 0.05$  – see Figure 2). The single-strand binding protein gene *OSB1* was also measurably  
 179 upregulated in *ung* lines (3.07-fold increase, unpaired T-test  $p = 0.053$ ). *RECA3*, *SSB*, and *WHY2*  
 180 showed no differential expression compared to wild-type (unpaired T-test  $p > 0.05$ ).

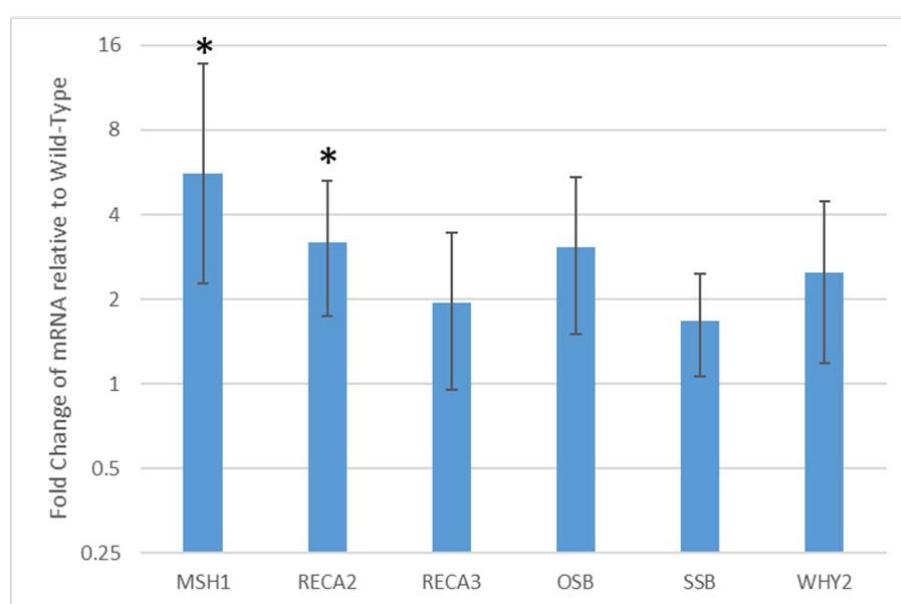

181

182 **Figure 1: Quantitative RT-PCR assays of enzymes involved in DSBR in *ung* lines relative to**  
 183 **wild-type.** Fold change in transcript level is shown on the Y-axis. Error bars are standard deviation  
 184 of three biological replicates. *MSH1* and *RECA2* are significantly transcriptionally upregulated in

185 *ung* lines relative to wild-type (5.60-fold increase and 3.19-fold increase, respectively. Unpaired,  
 186 2-tailed Student's t-test, \* indicates  $p < 0.05$ ). *OSB1* is nearly significantly upregulated in *ung* lines  
 187 relative to wild-type (3.07-fold increase. Unpaired T-test  $p = 0.053$ ).

188

189 *2.5 Increased Double-strand break repair*

190 If most DNA damage in plant mitochondria is repaired by double-strand break repair (DSBR),  
 191 supplemented by base excision repair [12], then in the absence of the Uracil-N-glycosylase (UNG)  
 192 pathway we predict an increase in DSBR. To find evidence of this we used quantitative PCR (qPCR)  
 193 to assay crossing over between identical non-tandem repeats because changes in the dynamics  
 194 around these repeats is indicative of changes in DNA processing at double-strand breaks [26, 27, 41].  
 195 Different combinations of primers in the unique sequences flanking the repeats allow us to  
 196 determine the relative copy numbers of parental-type repeats and low frequency recombinants  
 197 (Figure 2a). The mitochondrial genes *cox2* and *rrn18* were used to standardize relative amplification  
 198 between lines. We and others [24, 41] have found that some of the non-tandem repeats are  
 199 well-suited for qPCR analysis and are sensitive indicators of ectopic recombination, increasing in  
 200 repair-defective mutants. We analyzed the three repeats known as Repeats B, D, and L [23] in both  
 201 young leaves and mature leaves. In young leaves, there is no significant difference in the amounts of  
 202 parental or recombinant forms between *ung* lines and Col-0 (Figure 2b). In mature leaves, all three  
 203 repeats show significant reductions in the parental 2/2 form, while repeat B also shows a reduction  
 204 in the parental 1/1 form (unpaired T-test  $p < 0.05$ , Figure 2c). There is a difference in genome  
 205 dynamics around non-tandem repeats in young leaves compared to old leaves, indicating a  
 206 difference in the way these genomes are maintained.

207

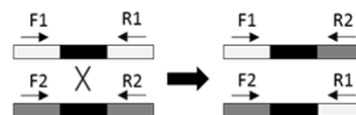

208

(a)

209

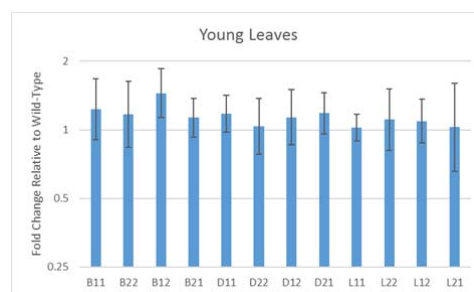

210

(b)

211

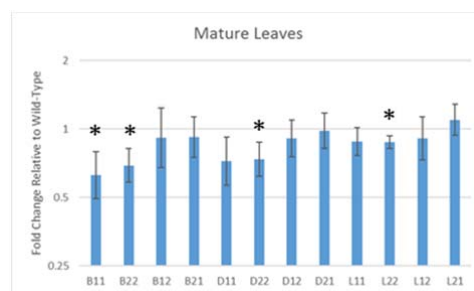



212

(c)

213

214

215

216

217

218

219

220

221

222

223

**Figure 2: qPCR analysis of intermediate repeat recombination in *ung* lines compared to wild-type.** Recombination at intermediate repeats is an indicator of increased double strand breaks in plant mitochondrial genomes. **(a)** Primer scheme for detecting parental and recombinant repeats. Using different combinations of primers that anneal to the unique sequence flanking the repeats, either parental type (1/1 and 2/2) or recombinant type (1/2 and 2/1) repeats can be amplified **(b)** Fold change of intermediate repeats in young leaves of *ung* lines relative to wild-type. Error bars are standard deviation of three biological replicates. **(c)** Fold change of intermediate repeats in mature leaves of *ung* lines relative to wild-type. Error bars are standard deviation of three biological replicates. B1/1, B2/2, D2/2, and L2/2 show significant reduction in copy number (unpaired, 2-tailed Student's t-test, \* indicates  $p < 0.05$ )

224

225

### 2.6 Transmission of SNPs across generations

226

227

228

229

230

231

232

233

234

235

236

237

238

239

240

To determine if any heteroplasmic SNPs are passed on to the next generation, two progeny of each of the wild-type, *ung*, MTP-A3G, and *ung* MTP-A3G plants that were sequenced above were planted. Leaves were collected from each plant when it was 17 days old (young leaf) and again when it was 36 days old (mature leaf). Both the young and mature leaves of each plant were sequenced and analyzed as described above. Only 2 heteroplasmic SNPs could be traced from a parent plant to both progeny, and 42 heteroplasmic SNPs could be traced from a parent plant to one progeny (Supplemental File 2). Interestingly, 115 heteroplasmic SNPs were detected in both offspring but not the parent plant. It is possible that heteroplasmic mutations that occur in reproductive tissue after the parental tissue had been collected could be passed on to the progeny. However, only 17 of these heteroplasmic SNPs are found in the mature tissue of both progeny, indicating that even if a heteroplasmic SNP is passed on to a future generation, it is likely to be removed from the mitochondrial population before reproduction by genetic drift or gene conversion. In fact, of the 13,914 heteroplasmic SNPs that were detected in young tissue across all samples, only 31 were detected in the mature tissue of the same plant. The overwhelming majority of heteroplasmic SNPs arose in mitochondria in non-meristematic differentiated tissue.

241

### 2.7 SNP accumulation in young vs mature leaves

242

243

244

245

246

247

248

249

To confirm that the effects of the UNG knockout and the expression of APOBEC3G are consistent, the progeny of the wild-type, *ung*, MTP-A3G, and *ung* MTP-A3G plants were analyzed and the ratio of heteroplasmic GC-AT to total heteroplasmic SNPs was compared as described above. In mature leaves, the results were similar to the previous generation: both the *ung* MTP-A3G and Col-0 MTP-A3G samples had increased GC-AT SNPs compared to the *ung* and Col-0. Interestingly, in young leaves, neither the *ung* MTP-A3G nor the Col-0 MTP-A3G samples had increased GC-AT SNPs (See Table 3). This indicates that the processes of mitochondrial genome maintenance is more efficient at repairing DNA damage in young leaves.

250

251

252

253

**Table 3: Heteroplasmic mitochondrial SNPs in the next generation of Col-0 wild-type, *ung* mutant lines, Col-0 MTP-A3G, and *ung* MTP-A3G.** SNPs were called using VarDict as described in Methods. SNP counts are shown for the entire mitochondrial genome. For the full spectrum of SNP types, including allele frequencies, see Supplemental file 2.

| Sample | GC-AT SNPs | Total SNPs | GC-AT /Total SNP Ratio |
|--------|------------|------------|------------------------|
|--------|------------|------------|------------------------|

|                             |     |      |       |
|-----------------------------|-----|------|-------|
| Col-0 1 Young               | 163 | 1997 | 0.082 |
| Col-0 2 Young               | 57  | 573  | 0.099 |
| <i>ung</i> 11 163-1 Young   | 140 | 1773 | 0.079 |
| <i>ung</i> 11 163-2 Young   | 57  | 623  | 0.091 |
| <i>ung</i> 11 176-1 Young   | 72  | 862  | 0.084 |
| <i>ung</i> 11 176-2 Young   | 154 | 1857 | 0.083 |
| <i>ung</i> 11 198-1 Young   | 76  | 840  | 0.090 |
| <i>ung</i> 11 198-2 Young   | 60  | 771  | 0.078 |
| Col-0 MTP-A3G-1 Young       | 182 | 1506 | 0.12  |
| Col-0 MTP-A3G-2 Young       | 135 | 1411 | 0.096 |
| <i>ung</i> MTP-A3G-1 Young  | 78  | 969  | 0.080 |
| <i>ung</i> MTP-A3G-2 Young  | 70  | 732  | 0.096 |
| Col-0 1 Mature              | 73  | 714  | 0.10  |
| Col-0 2 Mature              | 66  | 781  | 0.085 |
| <i>ung</i> 11 163-1 Mature  | 9   | 145  | 0.062 |
| <i>ung</i> 11 163-2 Mature  | 13  | 141  | 0.092 |
| <i>ung</i> 11 176-1 Mature  | 55  | 593  | 0.093 |
| <i>ung</i> 11 176-2 Mature  | 66  | 713  | 0.093 |
| <i>ung</i> 11 198-1 Mature  | 60  | 702  | 0.085 |
| <i>ung</i> 11 198-2 Mature  | 46  | 440  | 0.10  |
| Col-0 MTP-A3G-1 Mature      | 50  | 179  | 0.28  |
| Col-0 MTP-A3G-2 Mature      | 105 | 331  | 0.32  |
| <i>ung</i> MTP-A3G-1 Mature | 219 | 529  | 0.41  |
| <i>ung</i> MTP-A3G-2 Mature | 262 | 1226 | 0.21  |

254

## 255 2.8 Quality Control of DNA Library Preparation

256 A common source of error when calling low frequency SNPs is oxidative damage during library  
257 preparation [42]. This oxidative damage affects Guanines, and the effects of this damage can be  
258 measured by comparing the ratio of G to T mutations between the R1 paired-end read and the R2  
259 paired-end read. A Global Imbalance Value for G to T changes ( $GIV_{G,T}$ ) above 1.5 indicates DNA  
260 damage during library preparation, while a  $GIV_{G,T}$  below 1.5 indicates little damage during library  
261 preparation. All of the *ung* generation 10 libraries had a  $GIV_{G,T}$  above 1.5. However, all other  
262 samples, including all *ung* generation 11 libraries, had a  $GIV_{G,T}$  below 1.5 (see Supplemental file 2).  
263 For all data reported in this study, there is little difference between *ung* generation 10 and *ung*  
264 generation 11 samples. Any damage caused during library preparation of *ung* generation 10 samples  
265 does not change the outcome or interpretation of this study.

266

## 267 3. Discussion

268 In mitochondria as well as in the nucleus and chloroplast, cytosine is subject to deamination to  
269 uracil. This could potentially lead to transition mutations and is dealt with by a specialized base  
270 excision repair pathway. The first step in this pathway is hydrolysis of the glycosidic bond by the  
271 enzyme Uracil-N-glycosylase (UNG), leaving behind an abasic site [16]. An AP endonuclease can  
272 then cut the DNA backbone, producing a 3' OH and a 5' dRP. Both DNA polymerases found in *A.*  
273 *thaliana* mitochondria, POL1A and POL1B, exhibit 5'-dRP lyase activity, allowing them to remove  
274 the 5' dRP and polymerize a new nucleotide replacing the uracil [43]. In the absence of functional  
275 UNG protein, cytosine will still be deaminated in plant mitochondrial genomes, so efficient removal  
276 of uracil must be through a different repair mechanism, most likely DSBR [14, 15]. We have found



277 that in *ung* mutant lines, there is an increase in the expression of genes known to be involved in  
278 DSBR, and significant changes in the relative abundance of parental and recombinant forms of  
279 intermediate repeats, consistent with this hypothesis.

280 We have shown that when cytosine deamination is increased by the expression of the  
281 APOBEC3G cytidine deaminase in plant mitochondria, *ung* lines accumulate more G-C to A-T  
282 transitions in mature leaves, than does wild-type. Surprisingly, we have also found that under  
283 normal cellular conditions, without the added deamination activity of APOBEC3G, *ung* lines do not  
284 accumulate G-C to A-T transition mutations at a higher rate than wild-type. This finding is  
285 particularly surprising given the presumed bottlenecking of mitochondrial genomes during female  
286 gametogenesis and given the deliberate bottleneck in the experimental design of single-seed descent  
287 for 11 generations. This finding supports the hypothesis that plant mitochondria have a very  
288 efficient alternative damage surveillance system that can prevent G-C to A-T transitions from  
289 becoming fixed in the meristematic mitochondrial population.

290 The angiosperm MSH1 protein consists of a DNA mismatch binding domain fused to a  
291 double-stranded DNA endonuclease domain [1, 21] Although mainly characterized for its role in  
292 recombination surveillance [35], MSH1 is a good candidate for a protein that may be able to  
293 recognize and bind to various DNA lesions and make DSBs near the site of the lesion, thus funneling  
294 these types of damage into the DSBR pathway. With many mitochondria and many mitochondrial  
295 genomes in each cell there are numerous available templates for accurate repair of DSBs through  
296 homologous recombination, making this a plausible mechanism of genome maintenance. Here we  
297 show that in *ung* lines, *MSH1* is transcriptionally upregulated more than 5-fold compared to  
298 wild-type. This is consistent with the hypothesis that MSH1 initiates repair in plant mitochondria by  
299 creating a double-strand break at G-U pairs, and possibly other mismatches and damaged bases.

300 Several other proteins involved in processing plant mitochondrial DSBs have been  
301 characterized. The RECA homologs, RECA2 and RECA3, are homology search and strand invasion  
302 proteins [26-28, 40, 44-46]. The two mitochondrial RECA proteins share much sequence similarity, however  
303 RECA2 is dual targeted to both the mitochondria and the plastids, while RECA3 is found only in the  
304 mitochondria [26, 27]. RECA3 also lacks a C-terminal motif present on RECA2 and most other  
305 homologs. This motif has been shown to modulate the ability of RECA proteins to displace  
306 competing ssDNA binding proteins in *E. coli* [47]. Arabidopsis *reca2* mutants are seedling lethal and  
307 both *reca2* and *reca3* lines show increased ectopic recombination at intermediate repeats [26].  
308 Arabidopsis RECA2 has functional properties that RECA3 cannot perform, such as complementing a  
309 bacterial *recA* mutant during the repair of UV-C induced DNA lesions [20]. Here we show that in  
310 *ung* lines, RECA2 is transcriptionally upregulated more than 3-fold compared to the wild-type.  
311 However, RECA3 is not upregulated in *ung* lines. Responding to MSH1-initiated DSBs may be one of  
312 the functions unique to RECA2. The increased expression of RECA2 in the absence of a functional  
313 UNG protein is further evidence that uracil arising in DNA may be repaired through the  
314 mitochondrial DSBR pathway.

315 The ssDNA binding protein OSB1's transcript is upregulated over 3-fold. At a double strand  
316 break, OSB1 competitively binds to ssDNA and recruits the RECA proteins to promote the repair of  
317 a double strand break by a homologous template and avoid the error-prone  
318 microhomology-mediated end-joining pathway [48].

319 We also tested the differential expression of other genes known to be involved in processing  
320 mitochondrial DSBs. The single stranded binding protein genes *WHY2* and *SSB* were not found to be  
321 differentially expressed at the transcript level compared to wild-type. The presence of different  
322 ssDNA binding proteins influences which pathway of DSBR a break is repaired by [48]. Increased  
323 amounts of *WHY2* and *SSB* may not be needed for accurate repair of induced DSBs in the *ung* lines.

324 The specific patterns of recombination at mitochondrial intermediate repeats are different  
325 between wild-type, *ung* mutants, and DSBR mutants. In *msh1* lines, there is an increase in repeat  
326 recombination likely due to relaxed homology surveillance in the absence of the MSH1 protein [27].  
327 In mutant lines of ssDNA binding proteins involved in DSBR, such as *recA2*, *recA3*, and *osb1* [26, 49],  
328 there is an increase in repeat recombination due to differences in the way DNA ends are handled in  
329 the absence of these ssDNA binding proteins. In *ung* lines, the mitochondrial recombination

330 machinery is still intact, so any differences in repeat recombination between *ung* lines and wild-type  
331 are not due to differences in processing the DSB, but due to the increase in the amount of DSBs in the  
332 absence of UNG.

333 In young leaves, there is no significant difference in recombination at intermediate repeats  
334 between *ung* lines and wild-type, while in mature leaves, *ung* lines show a reduction in parental type  
335 repeats compared to wild-type. This could indicate that there is an increase in double strand breaks  
336 and an increase in attempted DSBR by break-induced replication at intermediate repeats or be an  
337 indication of degradation of mtDNA as differentiated tissue ages.

338 Plant mitochondrial genomes likely replicate by recombination-dependent replication (RDR)  
339 [50]. Most organellar genome replication occurs in meristematic tissue, where mitochondria fuse  
340 together to form a large, reticulate mitochondrion [10] This mitochondrial fusion provides a means  
341 to homogenize mtDNA by gene conversion, and repair lesions through homologous recombination  
342 [51]. Accurate repair of a uracil by homologous recombination would not be expected to change  
343 repeat dynamics. As cells differentiate and age, organellar genomes degrade [31]. Organellar  
344 genomes in non-reproductive tissue can be “abandoned” rather than repaired, reducing the  
345 metabolic cost of DNA repair [31]. In a mature cell, an attempt to repair uracil in the mitochondrial  
346 genome could lead to degradation of the DNA and changes in repeat dynamics if a double-strand  
347 break is initiated without a homologous template available. Clearly there is a difference in  
348 mitochondrial DNA maintenance in mature cells compared to young cells, either due to a lack of  
349 DNA repair in mature mitochondria, or a difference in DNA repair mechanism.

350 To determine the outcomes of genomic uracil in the absence of a functional UNG protein, we  
351 sequenced the genomes of several *ung* lines. No fixed mutations of any kind were found in *ung* lines,  
352 even after 11 generations of self-crossing. Low frequency heteroplasmic SNPs were found in both  
353 wild-type and *ung* lines, but *ung* lines showed no difference in the ratio of G-C to A-T transitions to  
354 other mutation types when compared to wild-type. When the rate of cytosine deamination was  
355 increased with the expression of the APOBEC3G deaminase, there was an increase in G-C to A-T  
356 transitions, but only in mature leaves. This is consistent with the idea of abandonment and is  
357 evidence that in mitochondrial genomes that have not been abandoned, there is an efficient and  
358 accurate system of non-specific repair.

359 Clearly the double-strand break repair pathway in plant mitochondria can repair uracil in DNA  
360 sufficiently to prevent mutation accumulation in the absence of the UNG protein. Why then has the  
361 BER pathway been conserved in plant mitochondria while NER and MMR have apparently been  
362 lost? DSBR protects the genome efficiently from mutations being inherited by the next generation  
363 (see Table 3). There may still be selection to maintain mitochondrial BER to reduce the rate of  
364 mitochondrial genome abandonment and degradation in aging tissues. Throughout the  
365 evolutionary history of *Arabidopsis thaliana* and into the present, wild growing plants are exposed to  
366 a range of growth conditions and stresses that experimental plants in a greenhouse avoid. The rate of  
367 spontaneous cytosine deamination increases with increasing temperature [52, 53], so DSBR alone  
368 may not be able repair the extent of uracil found in DNA across the range of temperatures a wild  
369 plant would experience, providing the selective pressure to maintain a distinct BER pathway in  
370 plant mitochondria. If DSBR activity is reduced or lost as leaf tissue ages, there may also be a  
371 selective advantage to the plant of maintaining BER in mature leaves so they can continue to  
372 perform intermediary metabolism even as they age.

373 Here we have provided evidence that in the absence of a dedicated BER pathway, plants  
374 growing in greenhouse growth chamber conditions do not accumulate mitochondrial SNPs at an  
375 increased rate. Instead, DNA damage is accurately repaired by double-strand break repair which  
376 also causes an increase in ectopic recombination at identical non-tandem repeats. It has recently been  
377 shown that mice lacking a different mitochondrial BER protein, oxoguanine glycosylase, also do not  
378 accumulate mitochondrial SNPs [54]. Here we show that in plants base-excision repair by UNG is  
379 similarly unnecessary to prevent mitochondrial mutations in growth chamber conditions. Clearly  
380 DSBR is efficient and accurate, and the presence of the UNG pathway reduces ectopic recombination  
381 slightly and can successfully repair uracil in DNA even if the rate of cytosine deamination is  
382 increased. We have also found that in mature leaves, uracil mutations do occur, further confirming

383 the hypothesis that organellar genomes are abandoned in terminally differentiated tissues [31] and  
384 emphasizing the need for considering the tissue age and type when interpreting experimental  
385 results on DNA replication, repair and recombination. Double strand break repair and  
386 recombination are important mechanisms in the evolution of plant mitochondrial genomes, but  
387 many key enzymes and steps in the repair pathway are still unknown. Further identification and  
388 characterization of these missing steps is sure to provide additional insight into the unique  
389 evolutionary dynamics of plant mitochondrial genomes.

## 390 4. Materials and Methods

### 391 4.1 Plant growth conditions

392 *Arabidopsis thaliana* Columbia-0 (Col-0) seeds were obtained from Lehle Seeds (Round Rock, TX,  
393 USA). *UNG* (AT3G18630) T-DNA insertion hemizygous lines were obtained from the Arabidopsis  
394 Biological Resource Center, line number CS308282. Hemizygous T-DNA lines were self-crossed to  
395 obtain homozygous lines (Genotyping primers: wild-type  
396 5'-TGTCAAAGTCCTGCAATTCTTCTCACA-3' and  
397 5'-TCGTGCCATATCTTGCAGACCACA-3',  
398 *ung* 5'-ATAATAACGCTGCGGACATCTACATTTT-3' and  
399 5'-ACTTGGAGAAGGTAAAGCAATTCA-3'). All plants were grown in walk-in growth  
400 chambers under a 16:8 light:dark schedule at 22°C. Plants grown on agar were surface sterilized and  
401 grown on 1x Murashige and Skoog Basal Medium (MSA) with Gamborg's vitamins (Sigma) with  
402 5µg/mL Nystatin Dihydrate to prevent fungal contamination.

### 403 4.2 Vector construction

404 The APOBEC3G gene [55] was synthesized by Life Technologies Gene Strings using *Arabidopsis*  
405 *thaliana* preferred codons and including the 62 amino acid mitochondrial targeting peptide (MTP)  
406 from Alternative Oxidase on the N-terminus of the translated protein. The MTP-A3G construct was  
407 cloned into the vector pUB-DEST (NCBI:taxid1298537) driven by the ubiquitin (UBQ10) promoter  
408 and transformed into wild-type and *ung Arabidopsis thaliana* plants by the *Agrobacterium* floral dip  
409 method [56]. To ensure proper mitochondrial targeting of the MTP-A3G construct, the construct was  
410 cloned into pK7FWG2 with a C-terminal GFP fusion [57]. *Arabidopsis thaliana* plants were again  
411 transformed by the *Agrobacterium* floral dip method and mitochondrial fluorescence was confirmed  
412 with confocal fluorescence microscopy.

### 413 4.3 RT-PCR

414 RNA was extracted from young leaves of plants grown on MSA during *ung* generation ten [58].  
415 Reverse transcription using Bio-Rad iScript was performed and the resulting cDNA was used as a  
416 template for qPCR to measure relative transcript amounts. Quantitative RT-PCR data was  
417 normalized using *UBQ10* and *GAPDH* as housekeeping gene controls. Reactions were performed in  
418 a Bio-Rad CFX96 thermocycler using 96 well plates and a reaction volume of 20µL/well. SYBRGreen  
419 mastermix (Bio-Rad) was used in all reactions. Three biological and three technical replicates were  
420 used for each amplification. Primers are listed in Table S1. The MIQE guidelines were followed [59]  
421 and primer efficiencies are listed in Table S3. The thermocycling program for all RT-qPCR was a  
422 ten-minute denaturing step at 95° followed by 45 cycles of 10s at 95°, 15s at 60°, and 13s at 72°.  
423 Following amplification, melt curve analysis was done on all reactions to ensure target specificity.  
424 The melt curve program for all RT-qPCR was from 65°-95° at 0.5° increments for 5s each.

### 425 4.4 Repeat recombination qPCR

426 DNA was collected from the mature leaves of Columbia-0 and generation ten *ung* plants using  
427 the CTAB DNA extraction method [60]. qPCR was performed using primers from the flanking  
428 sequences of the intermediate repeats. Primers are listed in Table S1. Using different combinations of  
429 forward and reverse primers, either the parental or recombinant forms of the repeat can be  
430 selectively amplified (see Figure 2a). The mitochondrially-encoded *cox2* and *rrn18* genes were used  
431 as standards for analysis. Reactions were performed in a Bio-Rad CFX96 thermocycler using 96 well  
432 plates with a reaction volume of 20µL/well. SYBRGreen mastermix (Bio-Rad) was used in all  
433 reactions. Three biological and three technical replicates were used for each reaction. The

434 thermocycling program for all repeat recombination qPCR was a ten-minute denaturing step at 95°  
435 followed by 45 cycles of 10s at 95°, 15s at 60°, and a primer specific amount of time at 72° (extension  
436 times for each primer pair can be found in Table S2). Following amplification, melt curve analysis  
437 was done on all reactions to ensure target specificity. The melt curve program for all qPCR was from  
438 65°-95° at 0.5° increments for 5s each.

#### 439 4.5 DNA sequencing

440 DNA extraction from frozen mature leaves of Columbia-0, generation 10 and *ung*, and  
441 MTP-A3G plants, and from young and mature leaves of the progeny of these plants was done by a  
442 modification of the SPRI magnetic beads method of Rowan *et al* [61, 62]. Genomic libraries for  
443 paired-end sequencing were prepared using a modification of the Nextera protocol [63], modified  
444 for smaller volumes following Baym *et al* [64]. Following treatment with the Nextera Tn5  
445 transposome 14 cycles of amplification were done. Libraries were size-selected to be between 400  
446 and 800bp in length using SPRI beads [62]. Libraries were sequenced with 150bp paired-end reads  
447 on an Illumina HiSeq 4000 by the Vincent J. Coates Genomics Sequencing Laboratory at UC  
448 Berkeley.

449 Reads were aligned using BWA-MEM v0.7.12-r1039 [34]. The reference sequence used for  
450 alignment was a file containing the improved Columbia-0 mitochondrial genome (accession  
451 BK010421.1) [65] as well as the TAIR 10 *Arabidopsis thaliana* nuclear chromosomes and chloroplast  
452 genome sequences [66]. A large portion of the mitochondrial genome has been duplicated into  
453 chromosome 2 [67]. To prevent reads from mapping to both locations, this large NuMT region was  
454 deleted from chromosome 2. Using Samtools v1.3.1 [68], bam files were sorted for uniquely mapped  
455 reads for downstream analysis.

456 Organellar variants were called using VarDict [35]. To minimize the effects of sequencing errors  
457 and reduce false positives, SNPs called by VarDict were filtered by the stringent quality parameters  
458 of Qmean  $\geq 30$ , MQ  $\geq 30$ , NM  $\leq 3$ , Pmean  $\geq 8$ , Pstd = 1, AltFwdReads  $\geq 3$ , and AltRevReads  $\geq 3$ . When  
459 calling low frequency SNPs, it is difficult to remove all false positives without also removing some  
460 true positives. By treating all samples to the same sequence analysis pipeline, all samples will have a  
461 similar spectrum of false positives. By analyzing the ratios of different SNP types, rather than raw  
462 SNP numbers, we further isolate biological effects from computational noise.

463 DNA damage during library preparation was measured by individually analyzing the paired  
464 ends of Illumina paired end sequencing and looking for imbalances in G to T mutations between the  
465 paired ends [42]. Mapped bam files were split into separate pairs using Samtools view and analyzed  
466 with VarDict as described above. Due to the reduction in read depth by  $\frac{1}{2}$  while working with only  
467 one set of paired-ends, the quality filter was adjusted so that AltFwdReads  $\geq 1$  and AltRevReads  $\geq 1$ .  
468 All other quality parameters remained the same. For each sample, the number of G to T mutations  
469 called in the R1 reads was divided by the number of G to T mutations called in the R2 to get a Global  
470 Imbalance Value (GIV<sub>G,T</sub>). A GIV<sub>G,T</sub> above 1.5 is considered damaged.

471 Nuclear variants were called using Samtools mpileup (v. 1.3.1) and Bcftools call (v. 1.2) and  
472 filtered for SNPgap of 3, Indelgap of 10, RPB>0.1 and QUAL>15, at least 3 high quality ALT reads  
473 (DP4[2]+DP4[3]  $\geq 3$ ), at least one high quality ALT read per strand (DP4[2]  $\geq 1$  and DP4[3]  $\geq 1$ ), and a  
474 high quality ALT allele frequency  $\geq 0.3$ . To avoid false positives, a 5 Mb region of each chromosome  
475 was used for analysis, avoiding centromeric and telomeric regions. Regions used for this analysis  
476 were: Chromosome 1 2Mb-7Mb, chromosome 3 3Mb-8Mb, chromosome 4 7Mb-12Mb, chromosome  
477 5 3Mb-8Mb. Chromosome 2 was excluded from this analysis to avoid false positives resulting from  
478 the presence of the large NuMT that has been duplicated and repeated there.

479

480 **Supplementary Materials:** The following are available online at [www.mdpi.com/xxx/s1](http://www.mdpi.com/xxx/s1), Supplemental file 1  
481 containing Figure S1, Table S1, Table S2 and Table S3, and Supplemental file 2 containing SNP analysis tables.

482 **Author Contributions:** All authors have read and agree to the published version of the manuscript.  
483 Conceptualization, E.L.W. and A.C.C.; methodology, E.L.W., E.P. and A.C.C.; software, E.L.W.; validation,  
484 E.L.W. and E.P.; formal analysis, E.L.W.; investigation, E.L.W. and E.P.; resources, A.C.C.; data curation, A.C.C.;

485 writing—original draft preparation, E.L.W. and A.C.C.; writing—review and editing, E.L.W., E.P. and A.C.C.;  
486 visualization, E.L.W.; supervision, A.C.C.; project administration, A.C.C.; funding acquisition, A.C.C.

487 **Funding:** This research was funded by the National Science Foundation (USA), grants MCB-1413152 and  
488 MCB-1933590 to A.C.C.

489 **Acknowledgments:** Conversations with Arnie Bendich about organelle DNA replication and repair in  
490 meristem and vegetative cells were interesting and illuminating. We are grateful to Emily Jezewski for finding  
491 time in her busy golf schedule to do some of the qPCR experiments. We thank Christian Elowski and the  
492 Nebraska Center for Biotechnology Core Research Facility for Microscopy for confocal fluorescent microscopy.  
493 This work used the Vincent J. Coates Genomics Sequencing Laboratory at UC Berkeley, supported by NIH S10  
494 OD018174 Instrumentation Grant. Daniel Schachtman helped with disposal of leaf tissues from generations 2-9.  
495 The use of product and company names is necessary to accurately report the methods and results; however, the  
496 United States Department of Agriculture (USDA) neither guarantees nor warrants the standard of the products,  
497 and the use of names by the USDA implies no approval of the product to the exclusion of others that may also  
498 be suitable. The USDA is an equal opportunity provider and employer.

499 **Conflicts of Interest:** “The authors declare no conflict of interest.”

500



501 **References**

- 502 1. Drouin, G., H. Daoud, and J. Xia, *Relative rates of synonymous substitutions in the mitochondrial, chloroplast*  
503 *and nuclear genomes of seed plants*. Mol Phylogenet Evol, 2008. **49**(3): p. 827-31.
- 504 2. Palmer, J.D. and L.A. Herbon, *Plant mitochondrial DNA evolves rapidly in structure, but slowly in sequence*. J  
505 Mol Evol, 1988. **28**(1-2): p. 87-97.
- 506 3. Richardson, A.O., et al., *The "fossilized" mitochondrial genome of Liriodendron tulipifera: ancestral gene content*  
507 *and order, ancestral editing sites, and extraordinarily low mutation rate*. BMC Biol, 2013. **11**: p. 29.
- 508 4. Siekevitz, P., *Powerhouse of the Cell*. Scientific American, 1957. **197**(1): p. 131-144.
- 509 5. Wolfe, K., W. Li, and P. Sharp, *Rates of nucleotide substitution vary greatly among plant*  
510 *mitochondrial, chloroplast and nuclear DNAs*. Proc. Natl. Acad. Sci. U S A, 1987. **84**: p. 9054-9058.
- 511 6. Sloan, D.B., et al., *Rapid evolution of enormous, multichromosomal genomes in flowering plant mitochondria with*  
512 *exceptionally high mutation rates*. PLoS Biol, 2012. **10**(1): p. e1001241.
- 513 7. Sloan, D.B. and D.R. Taylor, *Testing for selection on synonymous sites in plant mitochondrial DNA: the role of*  
514 *codon bias and RNA editing*. J Mol Evol, 2010. **70**(5): p. 479-91.
- 515 8. Wynn, E.L. and A.C. Christensen, *Are Synonymous Substitutions in Flowering Plant Mitochondria Neutral?* J.  
516 Molec. Evol, 2015. **81**(3-4): p. 131-135.
- 517 9. Kumar, R.A., D.J. Oldenburg, and A.J. Bendich, *Changes in DNA damage, molecular integrity, and copy*  
518 *number for plastid DNA and mitochondrial DNA during maize development*. J Exp Bot, 2014. **65**(22): p. 6425-39.
- 519 10. Segui-Simarro, J.M., M.J. Coronado, and L.A. Staehelin, *The mitochondrial cycle of Arabidopsis shoot apical*  
520 *meristem and leaf primordium meristematic cells is defined by a perinuclear tentaculate/cage-like mitochondrion*. Plant  
521 Physiol, 2008. **148**(3): p. 1380-93.
- 522 11. Segui-Simarro, J.M. and L.A. Staehelin, *Mitochondrial reticulation in shoot apical meristem cells of Arabidopsis*  
523 *provides a mechanism for homogenization of mtDNA prior to gamete formation*. Plant Signal Behav, 2009. **4**(3): p.  
524 168-71.
- 525 12. Boesch, P., et al., *Plant mitochondria possess a short-patch base excision DNA repair pathway*. Nucleic Acids  
526 Res, 2009. **37**(17): p. 5690-700.
- 527 13. Gualberto, J.M. and K.J. Newton, *Plant Mitochondrial Genomes: Dynamics and Mechanisms of Mutation*.  
528 Annu Rev Plant Biol, 2017.
- 529 14. Christensen, A.C., *Genes and Junk in Plant Mitochondria—Repair Mechanisms and Selection*. Genome Biol  
530 Evol, 2014. **6**(6): p. 1448-1453.
- 531 15. Christensen, A.C., *Mitochondrial DNA Repair and Genome Evolution*, in *Annual Plant Reviews, 2nd Edition,*  
532 *Plant Mitochondria*, D.C. Logan, Editor 2018, Wiley-Blackwell: New York, NY, USA. p. 11-31.
- 533 16. Cordoba-Cañero, D., et al., *Arabidopsis uracil DNA glycosylase (UNG) is required for base excision repair of*  
534 *uracil and increases plant sensitivity to 5-fluorouracil*. J Biol Chem, 2010. **285**(10): p. 7475-83.
- 535 17. Krokan, H.E., R. Standal, and G. Slupphaug, *DNA glycosylases in the base excision repair of DNA*. Biochem J,  
536 1997. **325 ( Pt 1)**: p. 1-16.
- 537 18. Christensen, A.C., *Plant mitochondrial genome evolution can be explained by DNA repair mechanisms*. Genome  
538 Biol Evol, 2013. **5**(6): p. 1079-86.
- 539 19. Wynn, E.L. and A.C. Christensen, *Repeats of Unusual Size in Plant Mitochondrial Genomes: Identification,*  
540 *Incidence and Evolution*. G3: Genes|Genomes|Genetics, 2019. **9**(2): p. 549-559.
- 541 20. Klein, M., et al., *Physical mapping of the mitochondrial genome of Arabidopsis thaliana by cosmid and YAC*  
542 *clones*. Plant J., 1994. **6**: p. 447-455.
- 543 21. Palmer, J.D. and C.R. Shields, *Tripartite structure of the Brassica campestris mitochondrial genome*. Nature,  
544 1984. **307**: p. 437.
- 545 22. Unseld, M., et al., *The mitochondrial genome of Arabidopsis thaliana contains 57 genes in 366,924 nucleotides*.  
546 Nat. Genet., 1997. **15**: p. 57-61.
- 547 23. Arrieta-Montiel, M.P., et al., *Diversity of the Arabidopsis Mitochondrial Genome Occurs via Nuclear-Controlled*  
548 *Recombination Activity*. Genetics, 2009. **183**: p. 1261-1268.
- 549 24. Davila, J.L., et al., *Double-strand break repair processes drive evolution of the mitochondrial genome in*  
550 *Arabidopsis*. BMC Biol, 2011. **9**: p. 64.
- 551 25. Abdelnoor, R.V., et al., *Substoichiometric shifting in the plant mitochondrial genome is influenced by a gene*  
552 *homologous to MutS*. Proc. Natl. Acad. Sci. U S A, 2003. **100**: p. 5968-5973.
- 553 26. Miller-Messmer, M., et al., *RecA-dependent DNA repair results in increased heteroplasmy of the Arabidopsis*  
554 *mitochondrial genome*. Plant Physiol, 2012. **159**(1): p. 211-26.
- 555 27. Shedge, V., et al., *Plant mitochondrial recombination surveillance requires unusual RecA and MutS homologs*.  
556 Plant Cell, 2007. **19**(4): p. 1251-64.
- 557 28. Odahara, M., et al., *Involvement of mitochondrial-targeted RecA in the repair of mitochondrial DNA in the moss,*  
558 *Physcomitrella patens*. Genes Genet Syst, 2007. **82**(1): p. 43-51.



- 559 29. Abdelnoor, R.V., et al., *Mitochondrial genome dynamics in plants and animals: Convergent gene fusions of a*  
560 *MutS* *homolog*. *J. Molec. Evol.*, 2006. **63**(2): p. 165-173.
- 561 30. Kleinstiver, B.P., J.M. Wolfs, and D.R. Edgell, *The monomeric GIY-YIG homing endonuclease I-BmoI uses a*  
562 *molecular anchor and a flexible tether to sequentially nick DNA*. *Nucleic Acids Res*, 2013. **41**(10): p. 5413-27.
- 563 31. Bendich, A.J., *DNA abandonment and the mechanisms of uniparental inheritance of mitochondria and*  
564 *chloroplasts*. *Chromosome Res*, 2013. **21**(3): p. 287-96.
- 565 32. Chen, K.M., et al., *Extensive mutagenesis experiments corroborate a structural model for the DNA deaminase*  
566 *domain of APOBEC3G*. *FEBS Lett*, 2007. **581**(24): p. 4761-6.
- 567 33. Grefen, C., et al., *A ubiquitin-10 promoter-based vector set for fluorescent protein tagging facilitates temporal*  
568 *stability and native protein distribution in transient and stable expression studies*. *Plant J*, 2010. **64**(2): p. 355-65.
- 569 34. Li, H., *Aligning sequence reads, clone sequences and assembly contigs with BWA-MEM*. arXiv:1303.3997v2,  
570 2013.
- 571 35. Lai, Z., et al., *VarDict: a novel and versatile variant caller for next-generation sequencing in cancer research*.  
572 *Nucleic Acids Res*, 2016. **44**(11): p. e108.
- 573 36. Halligan, D.L. and P.D. Keightley, *Spontaneous Mutation Accumulation Studies in Evolutionary Genetics*.  
574 *Annual Review of Ecology, Evolution, and Systematics*, 2009. **40**(1): p. 151-172.
- 575 37. Li, H., *A statistical framework for SNP calling, mutation discovery, association mapping and population genetical*  
576 *parameter estimation from sequencing data*. *Bioinformatics (Oxford, England)*, 2011. **27**(21): p. 2987-2993.
- 577 38. Edmondson, A.C., et al., *Characterization of a mitochondrially targeted single-stranded DNA-binding protein in*  
578 *Arabidopsis thaliana*. *Mol. Genet. Genomics*, 2005. **273**: p. 115-122.
- 579 39. Gualberto, J.M., et al., *The plant mitochondrial genome: dynamics and maintenance*. *Biochimie*, 2014. **100**: p.  
580 107-20.
- 581 40. Khazi, F.R., A.C. Edmondson, and B.L. Nielsen, *An Arabidopsis homologue of bacterial RecA that complements*  
582 *an E. coli recA deletion is targeted to plant mitochondria*. *Mol Gen Genet*, 2003. **269**(4): p. 454-463.
- 583 41. Wallet, C., et al., *The RECG1 DNA Translocase Is a Key Factor in Recombination Surveillance, Repair, and*  
584 *Segregation of the Mitochondrial DNA in Arabidopsis*. *Plant Cell*, 2015. **27**(10): p. 2907-2925.
- 585 42. Chen, L., et al., *DNA damage is a pervasive cause of sequencing errors, directly confounding variant identification*.  
586 *Science*, 2017. **355**(6326): p. 752-756.
- 587 43. Trasiña-Arenas, C.H., et al., *Identification of a unique insertion in plant organellar DNA polymerases*  
588 *responsible for 5'-dRP lyase and strand-displacement activities: Implications for Base Excision Repair*. *DNA Repair*  
589 *(Amst)*, 2018. **65**: p. 1-10.
- 590 44. McGrew, D. and K. Knight, *Molecular design and functional organization of the RecA protein*. *Critical Reviews*  
591 *in Biochemistry and Molecular Biology*, 2003. **38**(5): p. 385-432.
- 592 45. Rowan, B.A., D.J. Oldenburg, and A.J. Bendich, *RecA maintains the integrity of chloroplast DNA molecules in*  
593 *Arabidopsis*. *J Exp Bot*, 2010. **61**(10): p. 2575-88.
- 594 46. Xu, L. and K. Marians, *A dynamic RecA filament permits DNA polymerase-catalyzed extension of the invading*  
595 *strand in recombination intermediates*. *J. Biol. Chem.*, 2002. **277**: p. 14321-14328.
- 596 47. Egger, A.L., S.L. Lusetti, and M.M. Cox, *The C terminus of the Escherichia coli RecA protein modulates the*  
597 *DNA binding competition with single-stranded DNA-binding protein*. *J Biol Chem*, 2003. **278**(18): p. 16389-96.
- 598 48. Garcia-Medel, P.L., et al., *Plant organellar DNA polymerases repair double-stranded breaks by*  
599 *microhomology-mediated end-joining*. *Nucleic Acids Res*, 2019. **47**(6): p. 3028-3044.
- 600 49. Zaegel, V., et al., *The plant-specific ssDNA binding protein OSB1 is involved in the stoichiometric transmission of*  
601 *mitochondrial DNA in Arabidopsis*. *Plant Cell*, 2006. **18**(12): p. 3548-63.
- 602 50. Backert, S. and T. Borner, *Phage T4-like intermediates of DNA replication and recombination in the mitochondria*  
603 *of the higher plant Chenopodium album (L.)*. *Curr. Genet.*, 2000. **37**: p. 304-14.
- 604 51. Rose, R.J. and D.W. McCurdy, *New Beginnings: Mitochondrial Renewal by Massive Mitochondrial Fusion*.  
605 *Trends Plant Sci*, 2017. **22**(8): p. 641-643.
- 606 52. Drake, J.W. and R.H. Baltz, *The biochemistry of mutagenesis*. *Annu Rev Biochem*, 1976. **45**: p. 11-37.
- 607 53. Lewis, C.A., Jr., et al., *Cytosine deamination and the precipitous decline of spontaneous mutation during Earth's*  
608 *history*. *Proc Natl Acad Sci U S A*, 2016. **113**(29): p. 8194-9.
- 609 54. Kauppila, J.H.K., et al., *Base-excision repair deficiency alone or combined with increased oxidative stress does not*  
610 *increase mtDNA point mutations in mice*. *Nucleic Acids Res*, 2018. **46**(13): p. 6642-6669.
- 611 55. Carpenter, M.A., et al., *Determinants of sequence-specificity within human AID and APOBEC3G*. *DNA Repair*  
612 *(Amst)*, 2010. **9**(5): p. 579-87.
- 613 56. Clough, S.J. and A.F. Bent, *Floral dip: a simplified method for Agrobacterium-mediated transformation of*  
614 *Arabidopsis thaliana*. *Plant J.*, 1998. **16**: p. 735-743.
- 615 57. Karimi, M., D. Inze, and A. Depicker, *GATEWAY vectors for Agrobacterium-mediated plant transformation*.  
616 *Trends Plant Sci*, 2002. **7**(5): p. 193-195.

- 617 58. Onate-Sanchez, L. and J. Vicente-Carbajosa, *DNA-free RNA isolation protocols for Arabidopsis thaliana*,  
618 *including seeds and siliques*. BMC Res Notes, 2008. **1**: p. 93.
- 619 59. Bustin, S.A., et al., *The MIQE guidelines: minimum information for publication of quantitative real-time PCR*  
620 *experiments*. Clin Chem, 2009. **55**(4): p. 611-22.
- 621 60. Allen, G.C., et al., *A modified protocol for rapid DNA isolation from plant tissues using cetyltrimethylammonium*  
622 *bromide*. Nat Protoc, 2006. **1**(5): p. 2320-5.
- 623 61. Rowan, B.A., et al., *Rapid and inexpensive whole-genome genotyping-by-sequencing for crossover localization and*  
624 *fine-scale genetic mapping*. G3 (Bethesda), 2015. **5**(3): p. 385-98.
- 625 62. Rowan, B.A., et al., *Methods for Genotyping-by-Sequencing*, in *Genotyping: Methods and Protocols*, S.J. White  
626 and S. Cantalieris, Editors. 2017, Springer New York: New York, NY. p. 221-242.
- 627 63. Caruccio, N., *Preparation of next-generation sequencing libraries using Nextera technology: simultaneous DNA*  
628 *fragmentation and adaptor tagging by in vitro transposition*. Methods Mol Biol, 2011. **733**: p. 241-55.
- 629 64. Baym, M., et al., *Inexpensive multiplexed library preparation for megabase-sized genomes*. PLoS One, 2015. **10**(5):  
630 p. e0128036.
- 631 65. Sloan, D.B., Z. Wu, and J. Sharbrough, *Correction of Persistent Errors in Arabidopsis Reference Mitochondrial*  
632 *Genomes*. The Plant Cell, 2018. **30**(3): p. 525-527.
- 633 66. Berardini, T.Z., et al., *The Arabidopsis information resource: Making and mining the "gold standard" annotated*  
634 *reference plant genome*. Genesis, 2015. **53**(8): p. 474-85.
- 635 67. Stupar, R.M., et al., *Complex mtDNA constitutes an approximate 620-kb insertion on Arabidopsis thaliana*  
636 *chromosome 2: implication of potential sequencing errors caused by large-unit repeats*. Proc. Natl. Acad. Sci. U S A,  
637 2001. **98**(9): p. 5099-103.
- 638 68. Li, H., et al., *The Sequence Alignment/Map format and SAMtools*. Bioinformatics, 2009. **25**(16): p. 2078-9.
- 639
